# Supplementary material
Source: MDPI journal article supplement (https://www.mdpi.com/2304-6775/4/2/11)
Supplement: s1 [file s1]

Supplementary Materials: Content and Phrasing in Titles of Original Research and Review Articles in
2015: Range of Practice in Four Clinical Journals

Mary Ellen Kerans, Anne Murray and Sergi Sabatè

**S1**. System for coding content and surface features of article titles in clinical medicine

This supplement describes how the coding system was developed, norming of coders was accomplished, and consensus was reached in this study.

Development of Coding System and Norming of Coders

To ensure that the coding system was fairly debugged, the developer (Obs1) fully coded one journal before sending it to Obs2 with instructions and definitions. Obs2 coded two issues of that same journal and discussed differences with Obs1 with the purpose of clarifying and agreeing on criteria. After training of Obs2 and consensus, both coded the rest of the issues and journals independently. During this coding stage, they could discuss ambiguities or difficulties in applying concepts by email or on the phone. However, because inter-rater agreement was analyzed, they refrained from discussing specific titles.

Data Quality Control

When both coders’ data were on the spreadsheet, it was sent to the statistician, who checked for missing data. When the spreadsheet was complete, inter-rater agreement was analyzed (κ statistic). Meanwhile, the two observers discussed discrepancies between their coding and came to an agreement. If the coders needed a third opinion, the statistician, who was a co-author, served as physician (and subspecialty) informant. After consensus, the datasheet was sent again to the statistician for analysis.

Sampling and Coding Procedure

Step 1, gathering titles into a spreadsheet prepared for two coders(one spreadsheet for each journal) according to the following instructions:

(1) Extract titles from journal tables of contents. Paste into a labeled spreadsheet column, each title on a separate row (Figure 1). Pick up original articles, reviews, and any “special” articles that are more review-like than editorial-like (e.g., “Is widespread screening for hepatitis C justified?” or “Quality assurance of drugs used in clinical trials: proposal for adapting guidelines,” both from the *British Medical Journal*). If a link attaches to the article, keep it for easy reference, but do not bother to insist on it.

(2) Label issue in column A between each set of titles extracted.

(3) To answer QUESTION 4 semi-automatically before starting to code, set a LEN function to
count characters with spaces for each title in a column: see our column AE, where the formula
was =LEN(D#) and D was the column we used to paste titles and # was each title’s row number. Then count the number of words in each title (visually, if short, or in a Word document, if long) and enter the count into another column (column AD, Figure 1). Then to count characters without spaces, set another column (column AF, Figure 1) to calculate this formula: =AE#–(AD#-1), where # is the row number of each title counted. When all titles for chosen issues have been gathered (enough for about 60 to 70 titles: start with January 2015.

(4) Code for article type (column B, Figure 1): 1, original article, including meta-analyses and true systematic reviews with structured abstracts (do not gather guidelines); 2, review article; 3, mixed review/opinion article (e.g., see BMJ row 62) if any.


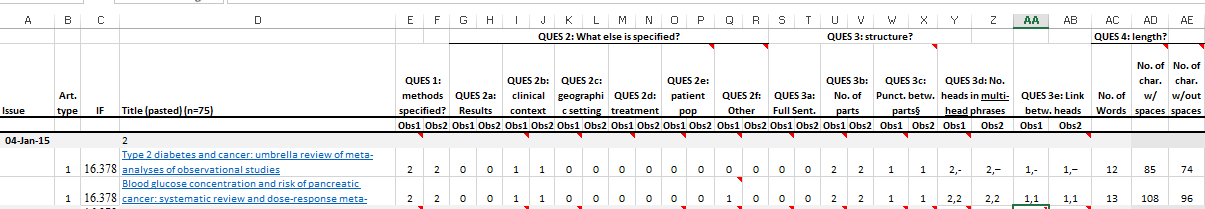


**Figure 1.** Arrangement of columns and rows for coding content and surface features of review and original research article titles in medical journals.

Step 2: coding for content

The observers coded titles according to the following instructions. In general they worked question by question, moving down a column rather than across a row. Occasionally two columns were done in parallel (e.g., coding number of title parts and the punctuation between them
[Q3b, Q3c]).

Question 1

(1) METHODS. For titles coded type 2 or 3 (reviews or similar) in column B, put “NP” (not pertinent) in the cell. For all titles coded 1 (originals), answer this question: **0, no specific methods term** is present; **1, yes**, a methods term is clearly present **in first position** (beginning of a single part title or in part 1 of a multi-part title); **2, yes**, a methods term is clearly present **in second position** (last part of a two- or multi-part title) **or at the end of a long single-part title.**

Notes on methods language: Mention of an animal “model” is a reference to method, or even the simple mention of any animal (e.g., “in rats”). At some points in a discipline’s development, certain new techniques might also highlight a method (e.g., “genotyping” in 2015).

QUESTION 2 (other content)

(2) RESULTS (2a).For titles coded type 2 or 3 (reviews or similar) in column B, put “NP” (not pertinent) in the cell. For all titles coded 1 (original research articles), answer this question: **0, no result** is mentioned; **1, yes**, a result is clearly mentioned.

The remaining questions must be answered for all article types.

(3) CLINICAL CONTEXT. (2b). **0, no** mention; **1, yes**, a clinical context is explicit.

Note: A clinical context refers to a disease, disorder, or any other condition patients see doctors about; a specific surgery or another procedure doctors do and would want their study to apply to; or a specific period during course of care (e.g., postoperative recovery) in which they will use the information from the study. When a clinical context is mentioned the function is to limit the scope of application of the results to that context.

(4) GEOGRAPHIC SETTING (2c). **0, no** mention; **1, yes**, if mentioned.

Note that some terms (e.g., “Medicaid,” which is specific to the US health system) might give geographic information even if a place is not named.

(5) TREATMENT (2d). **0, no** mention; **1, yes**, if mentioned.

Note: Treatments might be medical treatments, specific operations or technique modifications being studied (originals) or written about (reviews), or some procedure intended to cure or provide relief (palliative treatments), or even an educational or other “intervention” (e.g., paying patients to quit smoking). A treatment is intended to cure a condition, prevent it or provide relief from it. A mention of “cardiac surgery” or even “cardiac bypass” might be a reference to either clinical context or treatment, depending on the focus and design of the study.

(6) PATIENT POPULATION (2e). **0, no** mention; **1, yes**, if mentioned.

Note: This question is tricky to code not just because phrasing varies but because other information present sometimes strongly implies a specific population (e.g., a clinical context of infantile hemangioma implies young children or infants, so the code is 1). However “patients with type-2 diabetes” merely states a clinical context (a disease or condition) because patients with that diagnosis would be heterogeneous, not well defined. Be guided by the following information:

- Patient population is reported in order to narrow the scope of application of the results
  to a subpopulation defined by demographic characteristics (e.g., age, gender, socioeconomics, education). The [GRADE handbook](http://www.guidelinedevelopment.org/handbook/#h.50o1ws4do5tz) explains the reasoning for including this information further.
- In a veterinary clinical journal, the mention of specific animals would probably refer to patients whereas in a journal dedicated to human clinical medicine, the mention of animals would refer to method. See Q1 above.
- The phrase “population-based” is a reference to a sampling method (Q1), not a reference to a particular population.

Step 3, Coding for Structure

Q3a through 3e were answered for all articles (original research articles and reviews).

(1) FULL SENTENCE? (3a). Code as follows:

| No | 0 |
| --- | --- |
| Yes, a question | 1 |
| Yes, an affirmation | 2 |

Thus, a code of 0 refers to a phrasal title.

(2) NO. of PARTS (3b). **Write the number.** (This is a continuous variable.)

(3) PUNCTUATION BETWEEN PARTS (3c), *only for titles with ≥2 parts* as revealed in the previous question Q3b. If there is only 1 part according to Q3b, write “NP” (not pertinent).

Code as follows:

| colon | 1 |
| --- | --- |
| period (full stop) | 2 |
| dash (any type) | 3 |
| semicolon | 4 |
| comma | 5 |
| parentheses | 6 |
| question mark | 7 |

(4) No. of HEADS in multi-head phrases *(i.e., phrasal titles, not full sentences and not single-head phrases)* (3d). Expect to count the number of NOUN heads and GERUND/present PARTICIPLE (–*ing* form) heads; if there are any verbal-form heads (e.g., To Be or Not to Be), code them too. See definitions below.

Write NP if there is only a single head. Write the number (continuous variable) of heads for multi-head phrases. If a title has two parts, look at the number of heads in each part (e.g., a code of “NP,2” would refer to a single head in the first part of a two-part title and two heads in the second part.

Note that this is a surface-structure question, not a function or content question. Therefore in a title like “Less-Tight *versus* Tight Control of Hypertension in Pregnancy” there is only one head (*control*) even though functionally the reader understands that two clinical approaches (less-tight control and tight control) will be studied. A noun after less-tight is inferred but is not present in the structure. This is therefore a single-head noun phrase.

Definition of a noun phrase:

A noun phrase consists of a noun, plus prenominal modifiers (e.g., numbers, articles, adjectives) and postnominal modifiers (usually nonfinite verbs or prepositional phrases). The “head” of a noun phrase is the noun at its core. Nouns you see in postnominal prepositional phrases, for example, are not heads; they are part of phrases modifying the head and subordinate to it.

Definition of an *ing*-form phrasal title:

As –*ing* forms have various nonverbal syntactical functions (adjectives, objects of verbs or prepositions) in English, and they are fairly frequent in this literature, extend the notion of a phrasal title to these forms if and only if their syntactical function is “head of a phrase where a noun could be placed” and said phrase is not a subpart of a longer noun phrase (e.g., not a prepositional phrase post-modifying a central noun phrase). Thus, the coder should extrapolate from the definition of a noun phrase above. Any *ing*-form is a potential head in this study, but as with nouns, watch for other syntactic functions.

Examples:

“Causes and Timing of Death in Extremely Premature Infants from 2000 through 2011” (a phrasal title with two heads, in which an –*ing* form serves as the second head, NEJM)

“Enduring and Emerging Challenges of Informed Consent” (a single-head phrasal title in which two –*ing* forms are functioning syntactically as adjectives)

(2) LINK BETWEEN HEADS (3e) (*Only for multi-head noun-phrase titles; i.e., with codes of ≥2 for question 3d.*) If the title has ≥2 parts (question 3b), answer for both parts, as done in question 3d.

| and | 1 |
| --- | --- |
| or | 2 |
| *vs.* (or *versus*) | 3 |
| with (as a conjunction, not a preposition; this is unlikely to occur in well-edited, non-translated titles) | 4 |
| comma | 5 |
| Other? (Add a comment box to the cell, so they can be added to future instructions.) | 6 |

For multiple-part titles, code for both parts (e.g., “1,NP” would refer to a two-part title in which the first part has two heads separated by *and* and the second part has a single head or is a sentence). If neither part has multiple heads, coding “np (not pertinent)” is sufficient.

© 2016 by the authors; licensee MDPI, Basel, Switzerland. This article is an open access article distributed under the terms and conditions of the Creative Commons by Attribution (CC-BY) license (http://creativecommons.org/licenses/by/4.0/).
